# Supplementary material for: A sensitive isothermal fluorescence biosensor for microRNA detection coupling primer exchange reaction with catalytic hairpin assembly
Source: Royal Society of Chemistry journal article supplement (doi:10.1039/d2sd00115b), 2022-01-01
Supplement: d2sd00115b1.pdf [file d2sd00115b1.pdf]

## Supporting information for

### **A sensitive isothermal fluorescence biosensor for microRNAs detection coupling Primer Exchange Reaction with Catalytic Hairpin Assembly**

Jiatong Liu,<sup>a</sup> Minzhe Shen,<sup>a</sup> Jadera Talap,<sup>a</sup> Xudan Shen,<sup>a</sup> Zihan Song,<sup>a</sup> Haihong Hu,<sup>a</sup> Su Zeng<sup>a</sup> and Sheng Cai<sup>\*a</sup>

<sup>a</sup> Institute of Drug Metabolism and Pharmaceutical Analysis, Zhejiang Province Key Laboratory of Anti-Cancer Drug Research, Zhejiang University, Hangzhou, Zhejiang 310058, China.

**Table S1.** Sequences of DNA and RNA probes used.

| Name                  | Sequence (from 5' to 3')                                                                                                                                  |
|-----------------------|-----------------------------------------------------------------------------------------------------------------------------------------------------------|
| miR-200a              | UAA CAC UGU CUG GUA ACG AUG U                                                                                                                             |
| Primer a              | CAT CAT CAT                                                                                                                                               |
| Self-gated<br>Hairpin | GGT GCA TCA TCA TAC ATC GTT ACC AGA<br>CAG TGT TAA CAT CAT CAT GGG CCT TTT GGC<br>CCA TGA TGA TGT ATG ATG ATG CAC C<br>GGCATCATCATAACATCGTTACCAGACAGTGTTA |
| Hairpin-2             | ACATCATCATGGGCCTTTTGGCCCATGATGATG<br>TATGATGATGCC<br>CCCTCCCATCATCATAACATCGTTACCAGACAGT                                                                   |
| Hairpin-4             | GTTAACATCATCATGGGCCTTTTGGCCCATGAT<br>GATGTATGATGATGGGAGGG<br>BHQ1-ATG TAT GAT GAT GTA TGA TGA TGT                                                         |
| PER-CHA-H1            | TCC AAT CAC AAC ACA TCA TCA TAC ATC<br>ATC-FAM                                                                                                            |
| PER-CHA-H2            | GTA TGA TGA TGT GTT GTG ATT GGA ATC ATC<br>ATA CAT TCC AAT CAC AAC ACA TCA                                                                                |
| PER-CHA-H3            | GTT GTG ATT GGA ATG TAT GAT GAT ACA TCA<br>TCA TAC ATC ATC ATA CAT TCC AAT                                                                                |
| miR-200b              | CAU CUU ACU GGG CAG CAU UGG A                                                                                                                             |
| miR-200c              | CGU CUU ACC CAG CAG UGU UUG G                                                                                                                             |
| miR-429               | UAA UAC UGU CUG GUA AAA CCG U                                                                                                                             |
| miR-141               | CAU CUU CCA GUA CAG UGU UGG A                                                                                                                             |

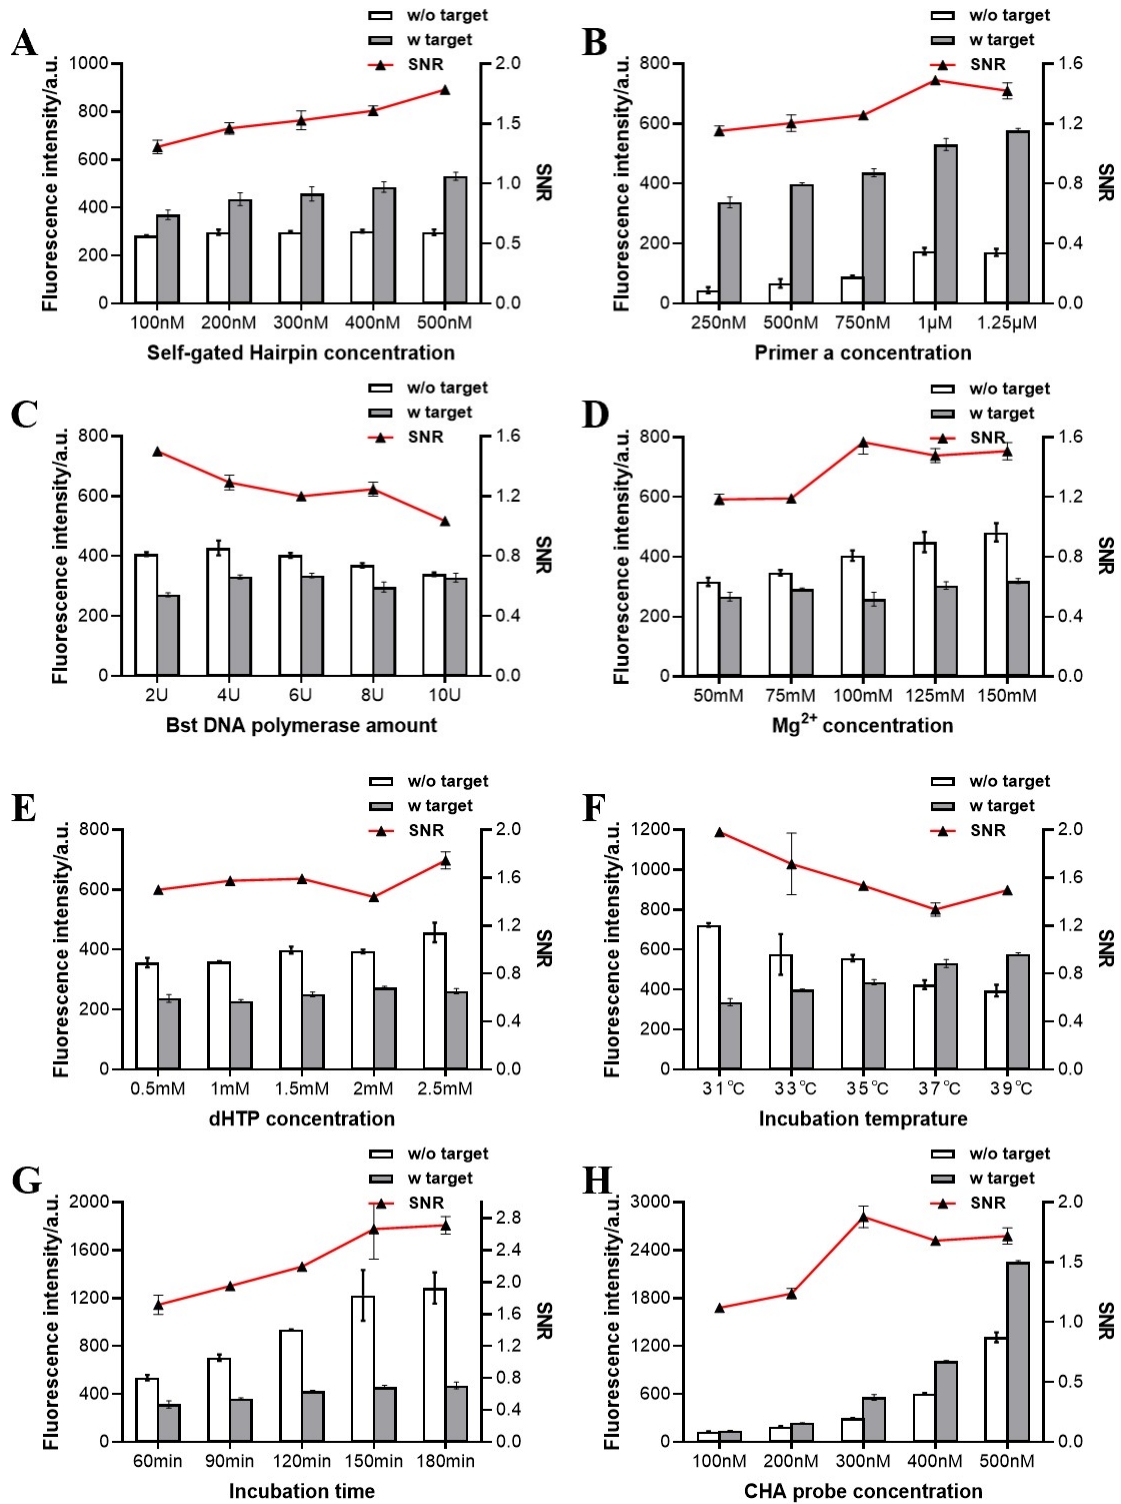

**Figure S1.** Optimization of the experimental parameters. Fluorescence intensity and SNR results of various parameters, including (A) Self-gated Hairpin concentration, (B) Primer a concentration, (C) Bst DNA polymerase amount, (D) Mg<sup>2+</sup> concentration, (E) dHTP concentration, (F) the incubation temperature, (G) the incubation time, and (H) the CHA probes concentration. The concentration of target miR-200a was 1 nM. Error bars: the standard deviation of triplicate independent measurements.

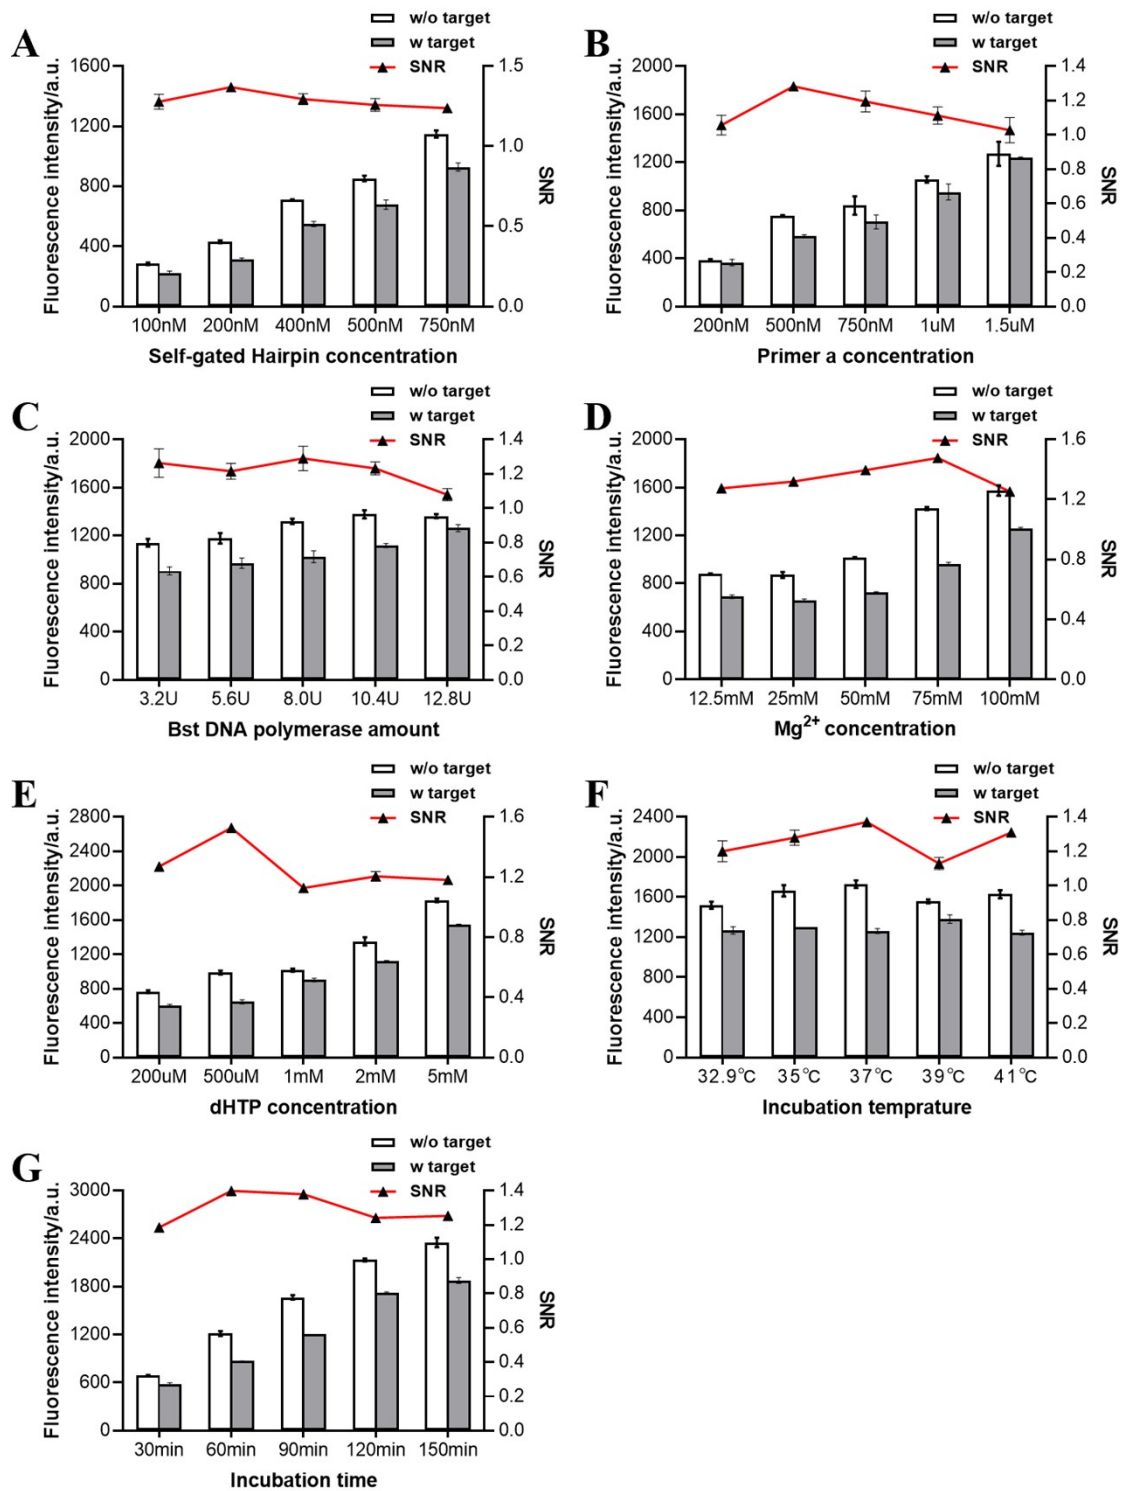

**Figure S2.** Optimization of the experimental parameters of PER. Fluorescence intensity with and without target of various parameters, including (A) Self-gated Hairpin concentration, (B) Primer a concentration, (C) Bst DNA polymerase amount, (D) Mg<sup>2+</sup> concentration, (E) dHTP concentration, (F) the incubation temperature and (G) the incubation time. The concentration of target miR-200a was 1 nM. Error bars: the standard deviation of triplicate independent measurements.

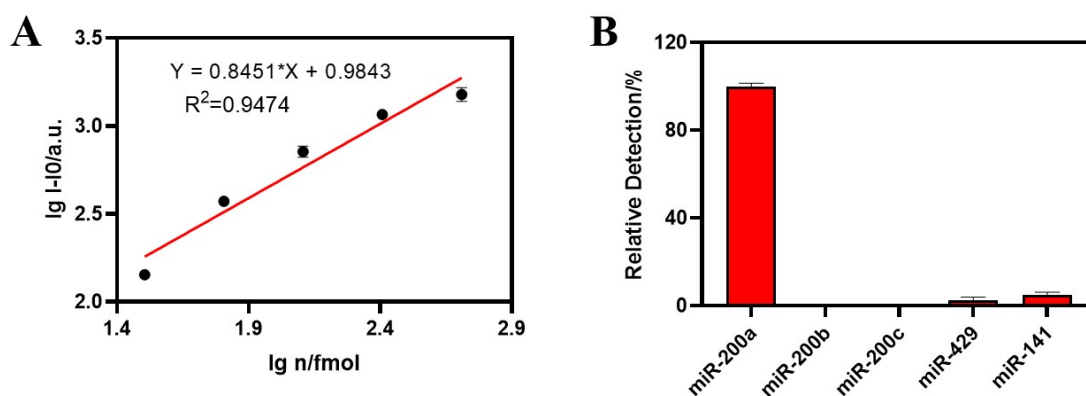

**Figure S3.** Analytical performance of the proposed biosensor. The Linear correlation between logarithmic fluorescence intensity and logarithmic concentration of PER (A). Selectivity of PER strategy. (B). Error bars: the standard deviation of triplicate independent measurements.

**Table S2.** Comparison of previously reported CHA method for miRNA detection

| Target     | Method                                                                                                    | Reaction time | Linear range  | LOD      | Ref.      |
|------------|-----------------------------------------------------------------------------------------------------------|---------------|---------------|----------|-----------|
| miR-21     | Catalytic-hairpin-assembly assisted DNA tetrahedron nanoprobe                                             | 8 h           | 0.1-10 nM     | 120 pM   | [1]       |
| miR-21     | Duplex-specific nuclease and catalytic hairpin assembly                                                   | 1 h           | 10 fM-100 pM  | 5.4 fM   | [2]       |
| miR-21     | Catalytic hairpin assembly coupled with enzymatic repairing amplification                                 | 2h            | 100 fM-1 nM   | 50 fM    | [3]       |
| miRNA      | Rolling circle amplification-based DNA machine coupling catalytic hairpin assembly with DNAzyme formation | 75 min        | 1 fM-1 pM     | 0.68 fM  | [4]       |
| miR-155    | Cascaded catalytic hairpin assembly                                                                       | 1 h           | 10 pM-1000 pM | 6.9 pM   | [5]       |
| miR-21     | DNA nanowire based localized catalytic hairpin assembly                                                   | 3 h           | 0-8 nM        | 2.0 pM   | [6]       |
| miR-let-7a | Catalytic hairpin assembly and spherical nucleic acid                                                     | 2 h           | 0.1-100 pM    | 53.7 fM  | [7]       |
| miR-200a   | Primer exchange reaction coupling with catalytic hairpin assembly                                         | 1 h           | 250 pM-10 nM  | 14.35 pM | this work |

**Table S3.** Recovery detection of miR-200a in 20% human serum (n=3)

| miRNA    | Added (fmol) | Detected (fmol) | Recovery (%) | RSD (%) |
|----------|--------------|-----------------|--------------|---------|
| miR-200a | 128          | 130.7           | 102.1        | 5.72    |
|          | 256          | 266.4           | 104.1        | 1.82    |
|          | 512          | 436.2           | 85.2         | 1.22    |

## References

- [1] Q. Huang, P.Q. Ma, H.D. Li, B.C. Yin, B.C. Ye, Catalytic-Hairpin-Assembly-Assisted DNA Tetrahedron Nanoprobe for Intracellular MicroRNA Imaging, *Acs Applied Bio Materials* 3(5) (2020) 2861-2866.
- [2] N. Hao, P.P. Dai, T. Yu, J.J. Xu, H.Y. Chen, A dual target-recycling amplification strategy for sensitive detection of microRNAs based on duplex-specific nuclease and catalytic hairpin assembly, *Chem. Commun.* 51(70) (2015) 13504-13507.
- [3] C.-H. Zhang, Y. Tang, Y.-Y. Sheng, H. Wang, Z. Wu, J.-H. Jiang, Ultrasensitive detection of microRNAs using catalytic hairpin assembly coupled with enzymatic repairing amplification, *Chem. Commun.* 52(93) (2016) 13584-13587.
- [4] J. Zhuang, W. Lai, G. Chen, D. Tang, A rolling circle amplification-based DNA machine for miRNA screening coupling catalytic hairpin assembly with DNAzyme formation, *Chem. Commun.* 50(22) (2014) 2935-2938.
- [5] X. Li, F. Yang, C. Gan, R. Yuan, Y. Xiang, Sustainable and cascaded catalytic hairpin assembly for amplified sensing of microRNA biomarkers in living cells, *Biosens. Bioelectron.* 197 (2022).
- [6] Q. Wei, J. Huang, J. Li, J. Wang, X. Yang, J. Liu, K. Wang, A DNA nanowire based localized catalytic hairpin assembly reaction for microRNA imaging in live cells, *Chem. Sci.* 9(40) (2018) 7802-7808.
- [7] X. Wei, D. Liu, M. Zhao, T. Yang, Y. Fan, W. Chen, P. Liu, J. Li, S. Ding, An enzyme-free surface plasmon resonance imaging biosensing method for highly sensitive detection of microRNA based on catalytic hairpin assembly and spherical nucleic acid, *Anal. Chim. Acta* 1108 (2020) 21-27.
